# Supplementary material
Source: publisher figshare collection journal article supplement (https://acs.figshare.com/ndownloader/files/4601098)
Supplement: Supplementary file 1 [file 4601098]

 
data_ab0647m 
 
_audit_creation_method            SHELXL-97 
_chemical_name_systematic 
; 
 ? 
; 
_chemical_name_common             ? 
_chemical_melting_point           ? 
_chemical_formula_moiety          ? 
_chemical_formula_sum 
 'C18 H35 N O4' 
_chemical_formula_weight          329.47 
 
loop_ 
 _atom_type_symbol 
 _atom_type_description 
 _atom_type_scat_dispersion_real 
 _atom_type_scat_dispersion_imag 
 _atom_type_scat_source 
 'C'  'C'   0.0033   0.0016 
 'International Tables Vol C Tables 4.2.6.8 and 6.1.1.4' 
 'H'  'H'   0.0000   0.0000 
 'International Tables Vol C Tables 4.2.6.8 and 6.1.1.4' 
 'N'  'N'   0.0061   0.0033 
 'International Tables Vol C Tables 4.2.6.8 and 6.1.1.4' 
 'O'  'O'   0.0106   0.0060 
 'International Tables Vol C Tables 4.2.6.8 and 6.1.1.4' 
 
_symmetry_cell_setting            'MONOCLINIC' 
_symmetry_space_group_name_H-M    'P 2(1)/C'  
 
loop_ 
 _symmetry_equiv_pos_as_xyz 
 'x, y, z' 
 '-x, y+1/2, -z+1/2' 
 '-x, -y, -z' 
 'x, -y-1/2, z-1/2' 
 
_cell_length_a                    5.6191(16) 
_cell_length_b                    36.825(11) 
_cell_length_c                    9.872(3) 
_cell_angle_alpha                 90.00 
_cell_angle_beta                  96.106(7) 
_cell_angle_gamma                 90.00 
_cell_volume                      2031.2(10) 
_cell_formula_units_Z             4 
_cell_measurement_temperature     273(2) 
_cell_measurement_reflns_used     ? 
_cell_measurement_theta_min       ? 
_cell_measurement_theta_max       ? 
 
_exptl_crystal_description        'PLATE' 
_exptl_crystal_colour             'COLOURLESS' 
_exptl_crystal_size_max           1.21 
_exptl_crystal_size_mid           0.84 
_exptl_crystal_size_min           0.04 
_exptl_crystal_density_meas       ? 
_exptl_crystal_density_diffrn     1.077 
_exptl_crystal_density_method     'not measured' 
_exptl_crystal_F_000              728 
_exptl_absorpt_coefficient_mu     0.075 
_exptl_absorpt_correction_type    'MULTI-SCAN' 
_exptl_absorpt_correction_T_min   0.9152 
_exptl_absorpt_correction_T_max   0.9970 
_exptl_absorpt_process_details    'SADABS' 
 
_exptl_special_details 
; 
 ? 
; 
 
_diffrn_ambient_temperature       273(2) 
_diffrn_radiation_wavelength      0.71073 
_diffrn_radiation_type            MoK\a 
_diffrn_radiation_source          'fine-focus sealed tube' 
_diffrn_radiation_monochromator   graphite 
_diffrn_measurement_device_type   'BRUKER CCD AREA DETECTOR' 
_diffrn_measurement_method        'PHI-OMEGA SCAN' 
_diffrn_detector_area_resol_mean  3
_diffrn_standards_number          ? 
_diffrn_standards_interval_count  ? 
_diffrn_standards_interval_time   ? 
_diffrn_standards_decay_%         ? 
_diffrn_reflns_number             10242 
_diffrn_reflns_av_R_equivalents   0.0900 
_diffrn_reflns_av_sigmaI/netI     0.1253 
_diffrn_reflns_limit_h_min        -6 
_diffrn_reflns_limit_h_max        6 
_diffrn_reflns_limit_k_min        -43 
_diffrn_reflns_limit_k_max        43 
_diffrn_reflns_limit_l_min        -6 
_diffrn_reflns_limit_l_max        11 
_diffrn_reflns_theta_min          1.11 
_diffrn_reflns_theta_max          25.00 
_reflns_number_total              3576 
_reflns_number_gt                 1514 
_reflns_threshold_expression      >2sigma(I) 
 
_computing_data_collection        'BRUKER AXS SMART 3' 
_computing_cell_refinement        'BRUKER AXS SMART 3' 
_computing_data_reduction         'BRUKER AXS SAINT' 
_computing_structure_solution     'SHELXS-97 (Sheldrick, 1990)' 
_computing_structure_refinement   'SHELXL-97 (Sheldrick, 1997)' 
_computing_molecular_graphics     'BRUKER SHELXTL' 
_computing_publication_material   'MERCURY 1.4' 
 
_refine_special_details 
; 
 Refinement of F^2^ against ALL reflections.  The weighted R-factor wR and 
 goodness of fit S are based on F^2^, conventional R-factors R are based 
 on F, with F set to zero for negative F^2^. The threshold expression of 
 F^2^ > 2sigma(F^2^) is used only for calculating R-factors(gt) etc. and is 
 not relevant to the choice of reflections for refinement.  R-factors based 
 on F^2^ are statistically about twice as large as those based on F, and R- 
 factors based on ALL data will be even larger. 
; 
 
_refine_ls_structure_factor_coef  Fsqd  
_refine_ls_matrix_type            full 
_refine_ls_weighting_scheme       calc  
_refine_ls_weighting_details 
 'calc w=1/[\s^2^(Fo^2^)+(0.0788P)^2^+0.0000P] where P=(Fo^2^+2Fc^2^)/3' 
_atom_sites_solution_primary      direct 
_atom_sites_solution_secondary    difmap 
_atom_sites_solution_hydrogens    geom 
_refine_ls_hydrogen_treatment     constr 
_refine_ls_extinction_method      none 
_refine_ls_extinction_coef        ? 
_refine_ls_number_reflns          3576 
_refine_ls_number_parameters      211 
_refine_ls_number_restraints      0 
_refine_ls_R_factor_all           0.1806 
_refine_ls_R_factor_gt            0.0633 
_refine_ls_wR_factor_ref          0.1932 
_refine_ls_wR_factor_gt           0.1305 
_refine_ls_goodness_of_fit_ref    0.958 
_refine_ls_restrained_S_all       0.958 
_refine_ls_shift/su_max           0.000 
_refine_ls_shift/su_mean          0.000 
 
loop_ 
 _atom_site_label 
 _atom_site_type_symbol 
 _atom_site_fract_x 
 _atom_site_fract_y 
 _atom_site_fract_z 
 _atom_site_U_iso_or_equiv 
 _atom_site_adp_type 
 _atom_site_occupancy 
 _atom_site_symmetry_multiplicity 
 _atom_site_calc_flag 
 _atom_site_refinement_flags 
 _atom_site_disorder_assembly 
 _atom_site_disorder_group 
N1 N 1.3806(5) 0.27843(8) 0.5403(3) 0.0428(8) Uani 1 1 d . . . 
H1NC H 1.4638 0.2904 0.6078 0.064 Uiso 1 1 calc R . . 
H1NB H 1.4801 0.2655 0.4951 0.064 Uiso 1 1 calc R . . 
H1NA H 1.2768 0.2636 0.5744 0.064 Uiso 1 1 calc R . . 
O1 O 0.6680(4) 0.24398(7) 0.3659(2) 0.0480(8) Uani 1 1 d . . . 
O2 O 0.6620(5) 0.19117(8) 0.2548(3) 0.0591(8) Uani 1 1 d . . . 
O3 O 1.0248(5) 0.23638(7) 0.6452(3) 0.0539(8) Uani 1 1 d . . . 
O4 O 0.6616(4) 0.21445(7) 0.6584(3) 0.0439(7) Uani 1 1 d . . . 
H4O H 0.6612 0.2298 0.7186 0.066 Uiso 1 1 calc R . . 
C1 C 0.7169(6) 0.21029(12) 0.3559(4) 0.0418(10) Uani 1 1 d . . . 
C1' C 1.2482(7) 0.30485(10) 0.4457(4) 0.0467(10) Uani 1 1 d . . . 
H1C H 1.1468 0.2915 0.3772 0.056 Uiso 1 1 calc R . . 
H1D H 1.3628 0.3185 0.3992 0.056 Uiso 1 1 calc R . . 
C2 C 0.8627(7) 0.21680(11) 0.6014(4) 0.0400(10) Uani 1 1 d . . . 
C2' C 1.0965(7) 0.33088(10) 0.5153(4) 0.0492(11) Uani 1 1 d . . . 
H2D H 1.1985 0.3469 0.5738 0.059 Uiso 1 1 calc R . . 
H2C H 0.9959 0.3175 0.5719 0.059 Uiso 1 1 calc R . . 
C3 C 0.8634(6) 0.19302(10) 0.4778(4) 0.0376(9) Uani 1 1 d . . . 
C3' C 0.9418(7) 0.35301(11) 0.4123(4) 0.0562(12) Uani 1 1 d . . . 
H3C H 0.8402 0.3365 0.3557 0.067 Uiso 1 1 calc R . . 
H3D H 1.0452 0.3651 0.3537 0.067 Uiso 1 1 calc R . . 
C4 C 1.1132(7) 0.18152(12) 0.4431(5) 0.0648(13) Uani 1 1 d . . . 
H4A H 1.1520 0.1904 0.3556 0.078 Uiso 1 1 calc R . . 
H4B H 1.2406 0.1870 0.5144 0.078 Uiso 1 1 calc R . . 
C4' C 0.7837(7) 0.38146(11) 0.4678(4) 0.0603(12) Uani 1 1 d . . . 
H4D H 0.8837 0.3994 0.5180 0.072 Uiso 1 1 calc R . . 
H4C H 0.6856 0.3700 0.5308 0.072 Uiso 1 1 calc R . . 
C5 C 1.0353(11) 0.14225(16) 0.4408(7) 0.123(2) Uani 1 1 d . . . 
H5B H 1.1390 0.1268 0.5008 0.148 Uiso 1 1 calc R . . 
H5A H 1.0108 0.1320 0.3499 0.148 Uiso 1 1 calc R . . 
C5' C 0.6223(7) 0.40032(12) 0.3563(5) 0.0654(13) Uani 1 1 d . . . 
H5D H 0.7222 0.4108 0.2922 0.078 Uiso 1 1 calc R . . 
H5C H 0.5220 0.3821 0.3076 0.078 Uiso 1 1 calc R . . 
C6 C 0.8051(8) 0.15231(10) 0.4980(4) 0.0635(13) Uani 1 1 d . . . 
H6B H 0.8013 0.1454 0.5926 0.076 Uiso 1 1 calc R . . 
H6A H 0.6623 0.1441 0.4427 0.076 Uiso 1 1 calc R . . 
C6' C 0.4621(8) 0.42988(12) 0.4025(5) 0.0693(14) Uani 1 1 d . . . 
H6D H 0.5611 0.4487 0.4486 0.083 Uiso 1 1 calc R . . 
H6C H 0.3632 0.4197 0.4678 0.083 Uiso 1 1 calc R . . 
C7' C 0.3010(8) 0.44701(12) 0.2866(5) 0.0698(14) Uani 1 1 d . . . 
H7D H 0.4003 0.4566 0.2205 0.084 Uiso 1 1 calc R . . 
H7C H 0.2005 0.4282 0.2417 0.084 Uiso 1 1 calc R . . 
C8' C 0.1424(8) 0.47715(12) 0.3298(5) 0.0716(14) Uani 1 1 d . . . 
H8C H 0.0425 0.4675 0.3957 0.086 Uiso 1 1 calc R . . 
H8D H 0.2427 0.4960 0.3748 0.086 Uiso 1 1 calc R . . 
C9' C -0.0165(8) 0.49400(12) 0.2135(5) 0.0746(14) Uani 1 1 d . . . 
H9C H -0.1166 0.4751 0.1688 0.089 Uiso 1 1 calc R . . 
H9D H 0.0837 0.5035 0.1476 0.089 Uiso 1 1 calc R . . 
C10' C -0.1760(8) 0.52427(12) 0.2551(5) 0.0779(15) Uani 1 1 d . . . 
H10C H -0.2763 0.5148 0.3209 0.093 Uiso 1 1 calc R . . 
H10D H -0.0760 0.5431 0.2998 0.093 Uiso 1 1 calc R . . 
C11' C -0.3330(9) 0.54093(14) 0.1399(6) 0.0933(18) Uani 1 1 d . . . 
H11C H -0.4276 0.5218 0.0927 0.112 Uiso 1 1 calc R . . 
H11D H -0.2321 0.5513 0.0760 0.112 Uiso 1 1 calc R . . 
C12' C -0.5000(9) 0.56995(14) 0.1803(6) 0.115(2) Uani 1 1 d . . . 
H12C H -0.6004 0.5601 0.2441 0.173 Uiso 1 1 calc R . . 
H12E H -0.5977 0.5784 0.1009 0.173 Uiso 1 1 calc R . . 
H12D H -0.4085 0.5898 0.2216 0.173 Uiso 1 1 calc R . . 
 
loop_ 
 _atom_site_aniso_label 
 _atom_site_aniso_U_11 
 _atom_site_aniso_U_22 
 _atom_site_aniso_U_33 
 _atom_site_aniso_U_23 
 _atom_site_aniso_U_13 
 _atom_site_aniso_U_12 
N1 0.0419(18) 0.053(2) 0.0346(19) -0.0011(17) 0.0068(16) -0.0014(16) 
O1 0.0637(19) 0.0520(18) 0.0300(16) 0.0080(14) 0.0126(14) 0.0139(14) 
O2 0.070(2) 0.070(2) 0.0337(17) -0.0090(16) -0.0102(15) 0.0080(15) 
O3 0.0491(16) 0.0705(19) 0.0418(17) -0.0100(15) 0.0037(14) -0.0162(15) 
O4 0.0439(16) 0.0532(18) 0.0347(17) -0.0063(13) 0.0049(13) -0.0020(13) 
C1 0.036(2) 0.060(3) 0.032(2) 0.001(2) 0.0114(19) 0.002(2) 
C1' 0.050(2) 0.054(2) 0.034(2) 0.006(2) -0.004(2) 0.011(2) 
C2 0.036(2) 0.053(3) 0.030(2) 0.004(2) -0.004(2) 0.003(2) 
C2' 0.051(3) 0.054(3) 0.043(3) 0.000(2) 0.005(2) 0.005(2) 
C3 0.036(2) 0.050(2) 0.026(2) 0.0021(19) 0.0020(18) 0.0033(18) 
C3' 0.055(3) 0.061(3) 0.052(3) 0.003(2) -0.002(2) 0.013(2) 
C4 0.048(3) 0.093(4) 0.053(3) -0.012(3) 0.001(2) 0.022(3) 
C4' 0.063(3) 0.056(3) 0.062(3) 0.002(2) 0.001(3) 0.010(2) 
C5 0.118(5) 0.083(4) 0.171(7) -0.012(4) 0.024(5) 0.046(4) 
C5' 0.061(3) 0.062(3) 0.073(3) 0.001(3) 0.004(3) 0.015(2) 
C6 0.096(4) 0.050(3) 0.045(3) -0.002(2) 0.009(3) 0.006(3) 
C6' 0.065(3) 0.063(3) 0.080(4) 0.002(3) 0.007(3) 0.015(2) 
C7' 0.071(3) 0.063(3) 0.074(4) 0.005(3) 0.000(3) 0.017(3) 
C8' 0.071(3) 0.064(3) 0.079(4) 0.006(3) 0.005(3) 0.021(3) 
C9' 0.078(3) 0.069(3) 0.076(4) 0.013(3) 0.004(3) 0.020(3) 
C10' 0.076(3) 0.068(3) 0.088(4) 0.015(3) 0.005(3) 0.019(3) 
C11' 0.101(4) 0.084(4) 0.094(4) 0.015(3) 0.003(4) 0.032(3) 
C12' 0.107(4) 0.090(4) 0.149(6) 0.027(4) 0.010(4) 0.045(4) 
 
_geom_special_details 
; 
 All esds (except the esd in the dihedral angle between two l.s. planes) 
 are estimated using the full covariance matrix.  The cell esds are taken 
 into account individually in the estimation of esds in distances, angles 
 and torsion angles; correlations between esds in cell parameters are only 
 used when they are defined by crystal symmetry.  An approximate (isotropic) 
 treatment of cell esds is used for estimating esds involving l.s. planes. 
; 
 
loop_ 
 _geom_bond_atom_site_label_1 
 _geom_bond_atom_site_label_2 
 _geom_bond_distance 
 _geom_bond_site_symmetry_2 
 _geom_bond_publ_flag 
N1 C1' 1.491(4) . ? 
N1 H1NC 0.8900 . ? 
N1 H1NB 0.8900 . ? 
N1 H1NA 0.8900 . ? 
O1 C1 1.277(4) . ? 
O2 C1 1.234(4) . ? 
O3 C2 1.205(4) . ? 
O4 C2 1.318(4) . ? 
O4 H4O 0.8200 . ? 
C1 C3 1.523(5) . ? 
C1' C2' 1.498(5) . ? 
C1' H1C 0.9700 . ? 
C1' H1D 0.9700 . ? 
C2 O3 1.205(4) 1 ? 
C2 C3 1.502(5) . ? 
C2' C3' 1.505(5) . ? 
C2' H2D 0.9700 . ? 
C2' H2C 0.9700 . ? 
C3 C4 1.539(5) . ? 
C3 C6 1.552(5) . ? 
C3' C4' 1.513(5) . ? 
C3' H3C 0.9700 . ? 
C3' H3D 0.9700 . ? 
C4 C5 1.510(7) . ? 
C4 H4A 0.9700 . ? 
C4 H4B 0.9700 . ? 
C4' C5' 1.518(5) . ? 
C4' H4D 0.9700 . ? 
C4' H4C 0.9700 . ? 
C5 C6 1.512(6) . ? 
C5 H5B 0.9700 . ? 
C5 H5A 0.9700 . ? 
C5' C6' 1.514(5) . ? 
C5' H5D 0.9700 . ? 
C5' H5C 0.9700 . ? 
C6 H6B 0.9700 . ? 
C6 H6A 0.9700 . ? 
C6' C7' 1.519(6) . ? 
C6' H6D 0.9700 . ? 
C6' H6C 0.9700 . ? 
C7' C8' 1.513(5) . ? 
C7' H7D 0.9700 . ? 
C7' H7C 0.9700 . ? 
C8' C9' 1.511(5) . ? 
C8' H8C 0.9700 . ? 
C8' H8D 0.9700 . ? 
C9' C10' 1.514(6) . ? 
C9' H9C 0.9700 . ? 
C9' H9D 0.9700 . ? 
C10' C11' 1.494(6) . ? 
C10' H10C 0.9700 . ? 
C10' H10D 0.9700 . ? 
C11' C12' 1.504(6) . ? 
C11' H11C 0.9700 . ? 
C11' H11D 0.9700 . ? 
C12' H12C 0.9600 . ? 
C12' H12E 0.9600 . ? 
C12' H12D 0.9600 . ? 
 
loop_ 
 _geom_angle_atom_site_label_1 
 _geom_angle_atom_site_label_2 
 _geom_angle_atom_site_label_3 
 _geom_angle 
 _geom_angle_site_symmetry_1 
 _geom_angle_site_symmetry_3 
 _geom_angle_publ_flag 
C1' N1 H1NC 109.5 . . ? 
C1' N1 H1NB 109.5 . . ? 
H1NC N1 H1NB 109.5 . . ? 
C1' N1 H1NA 109.5 . . ? 
H1NC N1 H1NA 109.5 . . ? 
H1NB N1 H1NA 109.5 . . ? 
C2 O4 H4O 109.5 . . ? 
O2 C1 O1 125.4(4) . . ? 
O2 C1 C3 117.9(4) . . ? 
O1 C1 C3 116.6(4) . . ? 
N1 C1' C2' 113.6(3) . . ? 
N1 C1' H1C 108.8 . . ? 
C2' C1' H1C 108.8 . . ? 
N1 C1' H1D 108.8 . . ? 
C2' C1' H1D 108.8 . . ? 
H1C C1' H1D 107.7 . . ? 
O3 C2 O4 122.4(4) 1 . ? 
O3 C2 O4 122.4(4) . . ? 
O3 C2 C3 125.0(4) 1 . ? 
O3 C2 C3 125.0(4) . . ? 
O4 C2 C3 112.6(3) . . ? 
C1' C2' C3' 110.6(3) . . ? 
C1' C2' H2D 109.5 . . ? 
C3' C2' H2D 109.5 . . ? 
C1' C2' H2C 109.5 . . ? 
C3' C2' H2C 109.5 . . ? 
H2D C2' H2C 108.1 . . ? 
C2 C3 C1 110.5(3) . . ? 
C2 C3 C4 114.9(3) . . ? 
C1 C3 C4 111.6(3) . . ? 
C2 C3 C6 116.1(3) . . ? 
C1 C3 C6 113.7(3) . . ? 
C4 C3 C6 88.4(3) . . ? 
C2' C3' C4' 116.7(3) . . ? 
C2' C3' H3C 108.1 . . ? 
C4' C3' H3C 108.1 . . ? 
C2' C3' H3D 108.1 . . ? 
C4' C3' H3D 108.1 . . ? 
H3C C3' H3D 107.3 . . ? 
C5 C4 C3 89.8(4) . . ? 
C5 C4 H4A 113.7 . . ? 
C3 C4 H4A 113.7 . . ? 
C5 C4 H4B 113.7 . . ? 
C3 C4 H4B 113.7 . . ? 
H4A C4 H4B 110.9 . . ? 
C3' C4' C5' 112.5(3) . . ? 
C3' C4' H4D 109.1 . . ? 
C5' C4' H4D 109.1 . . ? 
C3' C4' H4C 109.1 . . ? 
C5' C4' H4C 109.1 . . ? 
H4D C4' H4C 107.8 . . ? 
C4 C5 C6 91.0(4) . . ? 
C4 C5 H5B 113.5 . . ? 
C6 C5 H5B 113.5 . . ? 
C4 C5 H5A 113.5 . . ? 
C6 C5 H5A 113.5 . . ? 
H5B C5 H5A 110.8 . . ? 
C6' C5' C4' 116.0(4) . . ? 
C6' C5' H5D 108.3 . . ? 
C4' C5' H5D 108.3 . . ? 
C6' C5' H5C 108.3 . . ? 
C4' C5' H5C 108.3 . . ? 
H5D C5' H5C 107.4 . . ? 
C5 C6 C3 89.3(4) . . ? 
C5 C6 H6B 113.8 . . ? 
C3 C6 H6B 113.8 . . ? 
C5 C6 H6A 113.8 . . ? 
C3 C6 H6A 113.8 . . ? 
H6B C6 H6A 111.0 . . ? 
C5' C6' C7' 113.4(4) . . ? 
C5' C6' H6D 108.9 . . ? 
C7' C6' H6D 108.9 . . ? 
C5' C6' H6C 108.9 . . ? 
C7' C6' H6C 108.9 . . ? 
H6D C6' H6C 107.7 . . ? 
C8' C7' C6' 114.4(4) . . ? 
C8' C7' H7D 108.7 . . ? 
C6' C7' H7D 108.7 . . ? 
C8' C7' H7C 108.7 . . ? 
C6' C7' H7C 108.7 . . ? 
H7D C7' H7C 107.6 . . ? 
C9' C8' C7' 113.9(4) . . ? 
C9' C8' H8C 108.8 . . ? 
C7' C8' H8C 108.8 . . ? 
C9' C8' H8D 108.8 . . ? 
C7' C8' H8D 108.8 . . ? 
H8C C8' H8D 107.7 . . ? 
C8' C9' C10' 114.6(4) . . ? 
C8' C9' H9C 108.6 . . ? 
C10' C9' H9C 108.6 . . ? 
C8' C9' H9D 108.6 . . ? 
C10' C9' H9D 108.6 . . ? 
H9C C9' H9D 107.6 . . ? 
C11' C10' C9' 114.5(4) . . ? 
C11' C10' H10C 108.6 . . ? 
C9' C10' H10C 108.6 . . ? 
C11' C10' H10D 108.6 . . ? 
C9' C10' H10D 108.6 . . ? 
H10C C10' H10D 107.6 . . ? 
C10' C11' C12' 115.1(5) . . ? 
C10' C11' H11C 108.5 . . ? 
C12' C11' H11C 108.5 . . ? 
C10' C11' H11D 108.5 . . ? 
C12' C11' H11D 108.5 . . ? 
H11C C11' H11D 107.5 . . ? 
C11' C12' H12C 109.5 . . ? 
C11' C12' H12E 109.5 . . ? 
H12C C12' H12E 109.5 . . ? 
C11' C12' H12D 109.5 . . ? 
H12C C12' H12D 109.5 . . ? 
H12E C12' H12D 109.5 . . ? 
 
loop_ 
 _geom_hbond_atom_site_label_D 
 _geom_hbond_atom_site_label_H 
 _geom_hbond_atom_site_label_A 
 _geom_hbond_distance_DH 
 _geom_hbond_distance_HA 
 _geom_hbond_distance_DA 
 _geom_hbond_angle_DHA 
 _geom_hbond_site_symmetry_A 
N1 H1NC O2  0.89 1.86 2.743(4) 171.3 4_666 
N1 H1NB O1  0.89 1.91 2.788(4) 167.8 1_655 
N1 H1NA O3  0.89 1.93 2.812(4) 173.0 1 
O4 H4O O1  0.82 1.74 2.554(3) 170.0 4_566 
 
_diffrn_measured_fraction_theta_max    0.999 
_diffrn_reflns_theta_full              25.00 
_diffrn_measured_fraction_theta_full   0.999 
_refine_diff_density_max    0.224 
_refine_diff_density_min   -0.239 
_refine_diff_density_rms    0.083 
